# Supplementary material
Source: HighWire-hosted journal article supplement (doi:10.1101/rna.063057.117)
Supplement: Supplemental_Legend.docx [file Supplemental_Legend.docx]

Supporting Information

Assessment and Comparison of Thermal Stability of Phosphorothioate-DNA, DNA, RNA, 2’-F RNA and LNA in the Context of Phi29 pRNA 3WJ

Xijun Piao, Hongzhi Wang, Daniel W. Binzel and Peixuan Guo*

Center for RNA Nanobiotechnology and Nanomedicine; College of Pharmacy, Division of Pharmaceutics and Pharmaceutical Chemistry; College of Medicine; Dorothy M. Davis Heart and Lung Research Institute; James Comprehensive Cancer Center, The Ohio State University, Columbus, Ohio, USA.

*Address correspondence to:

Peixuan Guo, Ph.D

Center for RNA Nanobiotechnology and Nanomedicine; College of Pharmacy,

418 Biomedical Research Tower (BRT), 460 W 12th Ave. Columbus, OH 43210, USA

Phone: 614-293-2114,

Email: [guo.1091@osu.edu](mailto:Peixuan.guo@uky.edu)

Figure S1. Stepwise assembly of homogeneous 3WJ2’-F.

Figure S2. Stepwise assembly of hybrid 3WJs.

Figure S3. Melting of 3WJ-a2’-F + 3WJ-b2’-F dimer.

Figure S4. Whole body imaging of mice injected with fluorescent 2/3 3WJLNA and homogeneous 3WJ2’-F.
